# Supplementary material for: The pluripotency factor LIN28 in monkey and human testes: a marker for spermatogonial stem cells?
Source: PubMed Central journal article supplement — Mol Hum Reprod. 2012 Jun 11;18(10):477–88. doi: 10.1093/molehr/gas025 (PMC3457707; doi:10.1093/molehr/gas025), 2012-06-11
Supplement: supp_gas025_gas025supp.pdf [file supp_gas025_gas025supp.pdf]

# Aeckerle et al. Supplemental Fig.1

A) Bouin-fixed

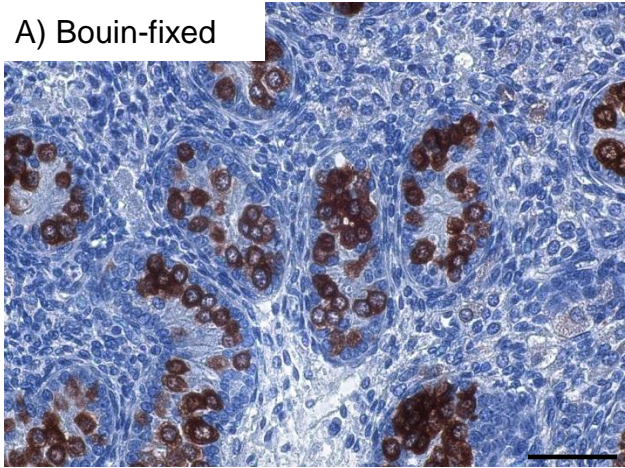

B) 10% PFA-fixed

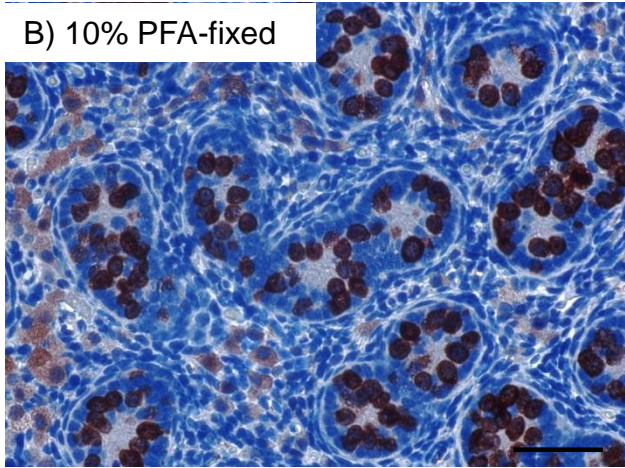

Comparison of LIN28-staining on differently fixed tissues shows no significant difference in the staining pattern between Bouin-fixed and 10% PFA-fixed tissue. A) Bouin-fixed testis from a newborn marmoset monkey. B) 10% PFA-fixed testis from a newborn marmoset monkey.

# Aeckerle et al. Supplemental Tab. 1

| sample | number of counted tubules | tubules containing LIN28-positive gonocytes/ (pre-) spermatogonia | number of LIN28-positive gonocytes/ (pre-) spermatogonia | % of tubules containing LIN28-positive gonocytes/ (pre-) spermatogonia |
|--------|---------------------------|-------------------------------------------------------------------|----------------------------------------------------------|------------------------------------------------------------------------|
| A      | 20                        | 20                                                                | 128                                                      | 100                                                                    |
| B      | 20                        | 20                                                                | 171                                                      | 100                                                                    |
| C      | 20                        | 20                                                                | 73                                                       | 100                                                                    |
| D      | 20<br>20                  | 20<br>20                                                          | 268<br>284                                               | 100<br>100                                                             |
| E      | 20                        | 16                                                                | 82                                                       | 80                                                                     |
| F      | 20                        | 20                                                                | 83                                                       | 100                                                                    |
| G      | 20                        | 20                                                                | 56                                                       | 100                                                                    |
| H      | 20<br>20                  | 15<br>16                                                          | 42<br>37                                                 | 75<br>80                                                               |
| I      | 259                       | 3                                                                 | 4                                                        | 1.16                                                                   |
| J      | 151                       | 5                                                                 | 7                                                        | 3.31                                                                   |
| K      | 412                       | 2                                                                 | 2                                                        | 0.49                                                                   |
| L      | 321<br>355                | 9<br>8                                                            | 14<br>12                                                 | 2.80<br>2.25                                                           |

Quantification of LIN28 expression in marmoset monkey testis. A-D) Testis samples from newborn marmoset monkeys. 20 tubules per animal were evaluated. As an internal control a second section was evaluated for one animal (D). 100%  $\pm$  0 of tubules in the newborn testis contained LIN28 positive gonocytes. E-H) Testis samples from pubertal marmoset monkeys. 20 tubules per animal were evaluated. As an internal control a second section was evaluated for one animal (H). In average 89.38%  $\pm$  5.33 of tubules contained LIN28 positive spermatogonia. I-L) Testis samples from adult marmoset monkeys. All tubules per section were evaluated. As an internal control a second section was evaluated for one animal (L). In average 1.87%  $\pm$  0.56 of tubules contained LIN28 positive spermatogonia.

# Aeckerle et al. Supplemental Tab. 2

| sample | number of counted tubules | tubules containing LIN28-positive gonocytes/ (pre-) spermatogonia | number of LIN28-positive gonocytes/ (pre-) spermatogonia | % of tubules containing LIN28-positive gonocytes/ (pre-)spermatogonia |
|--------|---------------------------|-------------------------------------------------------------------|----------------------------------------------------------|-----------------------------------------------------------------------|
| A      | 100                       | 90                                                                | nd                                                       | 90                                                                    |
| B      | 100                       | 82                                                                | nd                                                       | 82                                                                    |
| C      | 100                       | 83                                                                | nd                                                       | 83                                                                    |
| D      | 100                       | 79                                                                | nd                                                       | 79                                                                    |
| E      | 100                       | 98                                                                | nd                                                       | 98                                                                    |
| F      | 100                       | 78                                                                | nd                                                       | 78                                                                    |
| G      | 15                        | 6                                                                 | nd                                                       | 40                                                                    |
| H      | 141<br>179<br>186         | 7<br>22<br>11                                                     | 13<br>39<br>16                                           | 4.96<br>12.29<br>5.91                                                 |
| I      | 83<br>65<br>42            | 0<br>1<br>0                                                       | 0<br>1<br>0                                              | 0<br>1.54<br>0                                                        |
| J      | 171<br>194<br>215         | 8<br>2<br>16                                                      | 11<br>2<br>17                                            | 4.68<br>1.03<br>7.44                                                  |
| K      | 86<br>153<br>165          | 0<br>0<br>0                                                       | 0<br>0<br>0                                              | 0<br>0<br>0                                                           |
| L      | 45<br>72<br>60            | 0<br>2<br>2                                                       | 0<br>2<br>2                                              | 0<br>2.78<br>3.33                                                     |
| M      | 114<br>93<br>140          | 1<br>0<br>0                                                       | 1<br>0<br>0                                              | 0.88<br>0<br>0                                                        |
| N      | 63<br>25<br>73            | 0<br>0<br>1                                                       | 0<br>0<br>1                                              | 0<br>0<br>1.37                                                        |
| O      | 31<br>46<br>31            | 0<br>1<br>0                                                       | 0<br>1<br>0                                              | 0<br>2.17<br>0                                                        |
| P      | 161<br>171<br>169         | 1<br>1<br>0                                                       | 1<br>1<br>0                                              | 0.62<br>0.58<br>0                                                     |
| Q      | 64<br>125<br>97           | 0<br>0<br>0                                                       | 0<br>0<br>0                                              | 0<br>0<br>0                                                           |
| R      | 322<br>335<br>351         | 1<br>6<br>3                                                       | 1<br>6<br>4                                              | 0.31<br>1.79<br>0.85                                                  |
| S      | 953<br>963<br>907         | 0<br>0<br>2                                                       | 0<br>0<br>2                                              | 0<br>0<br>0.22                                                        |
| T      | 207<br>208<br>213         | 0<br>0<br>0                                                       | 0<br>0<br>0                                              | 0<br>0<br>0                                                           |
| U      | 1054<br>1026<br>1021      | 0<br>0<br>0                                                       | 0<br>0<br>0                                              | 0<br>0<br>0                                                           |
| V      | 1120<br>864<br>1087       | 2<br>4<br>0                                                       | 3<br>7<br>0                                              | 0.18<br>0.46<br>0                                                     |

LIN28 expression in human testis. A-F) fetal testis samples. 100 tubules per sample were evaluated. In average  $85\% \pm 3.49$  of tubules contained LIN28-positive gonocytes. G) Testis samples from a one year old boy. The section contained 15 tubules, from which 6 contained LIN28 positive (pre-) spermatogonia (40%). H-V) adult testis samples. H-Q are samples from patients with testis tumors on the contra-lateral side, R-V are samples from prostate carcinoma patients with no evidence of testicular malfunction. All tubules per section were evaluated. In average  $1.19\% \pm 1.04$  of tubules contained LIN28-positive spermatogonia. nd = not determined.
